# Supplementary material
Source: PubMed Central journal article supplement (PMC10352926)
Supplement: jamainternmed-e232986-s001.pdf [file jamainternmed-e232986-s001.pdf]

## Supplemental Online Content

Copaescu AM, Vogrin S, James F, et al. Efficacy of a clinical decision rule to enable direct oral challenge in patients with low-risk penicillin allergy: the PALACE randomized clinical trial. *JAMA Intern Med*. Published online July 17, 2023.  
doi:10.1001/jamainternmed.2023.2986

### **eMethods**

**eFigure 1.** The PEN-FAST clinical decision rule

**eFigure 2.** Primary outcome, secondary outcomes and subgroup analysis of the primary outcome

**eTable 1.** Skin testing drug allergy concentrations and type of penicillin and doses used in the trial

**eTable 2.** Characteristics of patients with positive primary outcomes

**eTable 3.** Sensitivity analysis using exact methods for confidence intervals

**eTable 4.** Safety outcomes in the first 2 days and 5 days following oral penicillin challenge

**eTable 5.** Safety outcome inclusions

**eTable 6.** Efficacy outcomes

This supplemental material has been provided by the authors to give readers additional information about their work.

## **eMethods**

### **Recruiting centers and ethics**

Vanderbilt University Institutional Review Board (IRB #202174), Tennessee, USA

Duke University Institutional Review Board (IRB #Pro00108461), North Carolina, USA

McGill University Health Centre Research Ethics Board in Canada (PALACE / 2022-7605), Quebec, Canada

Austin Health Human Research Ethics Committee (HREC/62425/Austin-2020), Victoria, Australia

**The Trial Management Group (TMG)** comprised the principal coordinating investigator, the trial statistician, the international trial coordinator and two research trial coordinators. The TMG supervised the day-to-day conduct of the clinical trial, including safety oversight activities, and acted on advice from other individuals or groups. The TMG was also responsible for communicating essential protocol modifications to relevant parties, such as the site investigators.

**An independent data safety management board (DSMB)** reviewed the study's progress and monitored adherence to the protocol, participant recruitment, outcomes, complications, and other issues related to participant safety. The DSMB comprised of two clinicians (infectious disease and internal medicine specialists) and one biostatistician unrelated to the study. They had scheduled meetings every two months and monitored the study's assumptions underlying sample size calculations. The DSMB could recommend whether the study should continue or be terminated and consider participant safety or other circumstances as grounds for early termination, including compelling internal or external evidence of treatment differences or the feasibility of addressing the study hypotheses (e.g. poor participant enrolment).

### **Eligibility criteria**

#### **Inclusion:**

1. Adult patients ( $\geq 18$  years) referred to the outpatient allergy clinic for a penicillin allergy history;
2. Willing and able to give consent

#### **Exclusion:**

1. Patient age is  $< 18$  years;
2. Patients with a PEN-FAST score  $\geq 3$
3. Pregnancy
4. Any other illness that, in the investigator's judgement, will substantially increase the risk associated with the subject's participation in this study, including neurological or psychological conditions;
5. Patients with a history of type A adverse drug reaction, drug-associated anaphylaxis, idiopathic urticaria/anaphylaxis, mastocytosis, serum sickness, blistering skin eruption or acute interstitial nephritis;
6. Patients where the allergy history was not able to be confirmed with the patient;
7. Patients on concurrent antihistamine therapy;
8. Patients receiving more than stress dose steroids (i.e.  $> 50\text{mg QID hydrocortisone}$  [or steroid equivalent]).

### **Secondary outcomes**

#### **Feasibility outcome measures:**

⇒ Proportion of patients referred to the outpatient allergy clinic that are eligible for intervention (i.e. randomisation) as per protocol (eligibility to screened ratio).

⇒ Feasibility of recruitment defined as the proportion of patients consenting to participate in the study per protocol from eligible patients (recruitment to eligibility ratio).

⇒ Feasibility of intervention delivery defined as the proportion of patients randomized to the intervention arm who had the intervention delivered as per protocol (intervention to recruitment ratio).

#### **Safety outcome measures:**

⇒ The proportion of patients with a penicillin allergy who experience an antibiotic-associated immune-mediated adverse event OR severe adverse drug reaction as per protocol definitions.

⇒ The proportion of patients with a penicillin allergy who experience an antibiotic associated, non-immune-mediated adverse event.

⇒ The proportion of patients who will respect the protocol (protocol compliance).

**Exploratory efficacy outcomes:**

- ⇒ Proportion of patients with a positive penicillin skin test.
- ⇒ Proportion of patients with non-immune-mediated positive oral provocation.
- ⇒ Proportion of patients with severe adverse reactions—*anaphylaxis/ death*.
- ⇒ Time from randomisation to delabeling.
- ⇒ Number of appointments required for penicillin allergy delabeling.
- ⇒ Assessment with the prequestionnaire and the 6-month follow-up questionnaire (outcomes not discussed in this report)

**eFigure 1.** The PEN-FAST clinical decision rule  
*Figure extracted for reference*<sup>13</sup>.

|                                     |                                                                                                                |                                                          |
|-------------------------------------|----------------------------------------------------------------------------------------------------------------|----------------------------------------------------------|
| <b>PEN</b>                          | Penicillin allergy reported by patient                                                                         | <input type="checkbox"/> If yes, proceed with assessment |
| <b>F</b>                            | Five years or less since reaction <sup>a</sup>                                                                 | <input type="checkbox"/> <b>2 points</b>                 |
| <b>A</b>                            | Anaphylaxis or angioedema                                                                                      | <input type="checkbox"/> <b>2 points</b>                 |
| <b>S</b>                            | OR<br>Severe cutaneous adverse reaction <sup>b</sup>                                                           |                                                          |
| <b>T</b>                            | Treatment required for reaction <sup>a</sup>                                                                   | <input type="checkbox"/> <b>1 point</b>                  |
|                                     |                                                                                                                | <hr/>                                                    |
|                                     |                                                                                                                | <input type="checkbox"/> <b>Total points</b>             |
| <b>Interpretation</b>               |                                                                                                                |                                                          |
| <b>Points</b>                       |                                                                                                                |                                                          |
| <input type="checkbox"/> <b>0</b>   | <b>Very low risk</b> of positive penicillin allergy test <1% (<1 in 100 patients reporting penicillin allergy) |                                                          |
| <input type="checkbox"/> <b>1-2</b> | <b>Low risk</b> of positive penicillin allergy test 5% (1 in 20 patients)                                      |                                                          |
| <input type="checkbox"/> <b>3</b>   | <b>Moderate risk</b> of positive penicillin allergy test 20% (1 in 5 patients)                                 |                                                          |
| <input type="checkbox"/> <b>4-5</b> | <b>High risk</b> of positive penicillin allergy test 50% (1 in 2 patients)                                     |                                                          |

<sup>a</sup> Includes unknown

<sup>b</sup> Severe cutaneous adverse reactions include potential Stevens-Johnson syndrome, toxic epidermal necrolysis, drug reaction with eosinophilia and systemic symptoms, and acute generalized exanthematous pustulosis. Patients with a severe delayed rash with mucosal involvement should be considered to have a severe cutaneous adverse reaction. Acute interstitial nephritis, drug-induced liver injury, serum sickness and isolated drug fever were excluded phenotypes from the derivation and validation cohorts.

**eFigure 2.** Primary outcome, secondary outcomes and subgroup analysis of the primary outcome

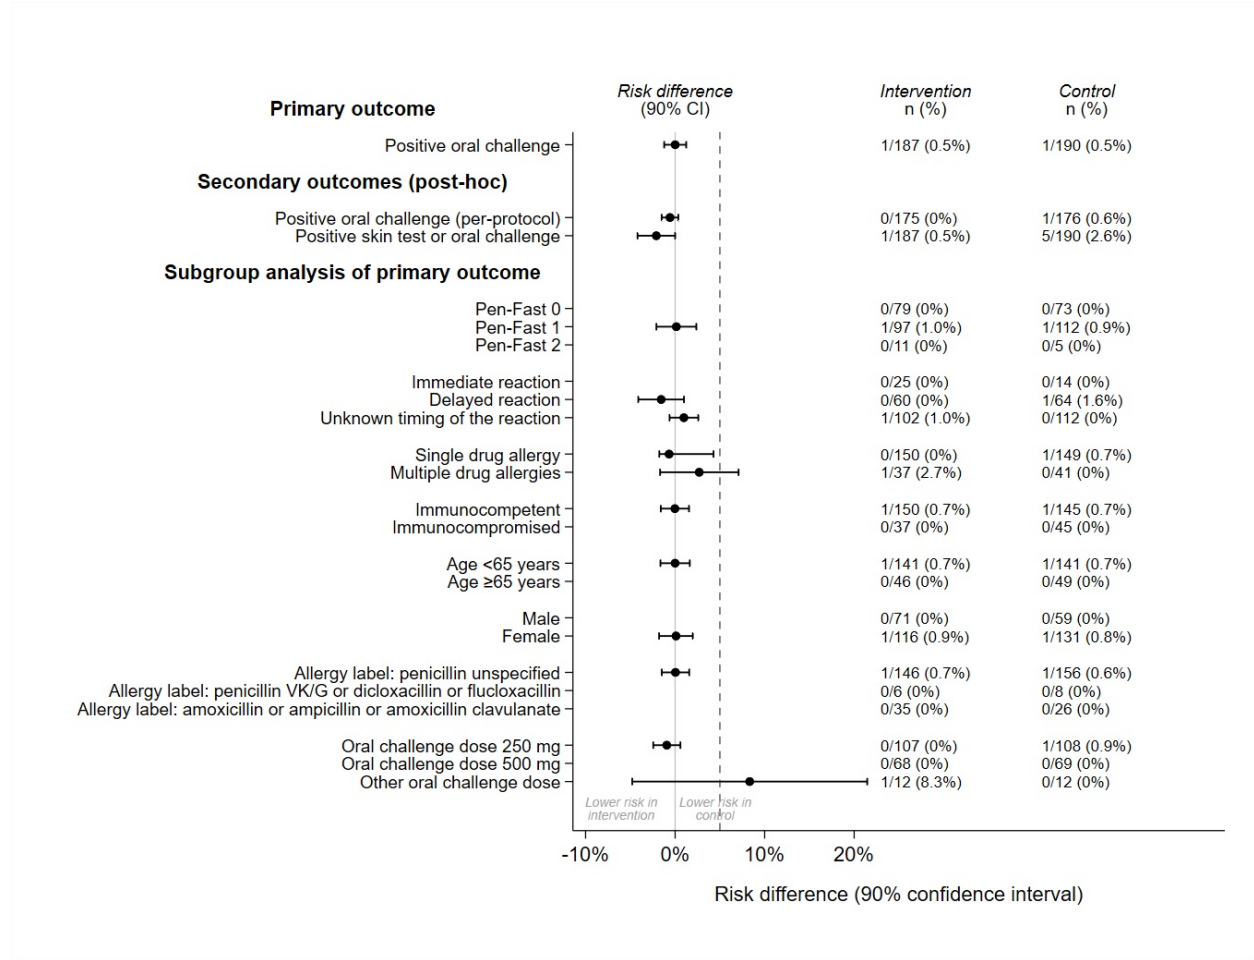

**Notes:**

- (1) The vertical grey lines represent no risk difference, while the dashed line represents the non-inferiority margin of 5%.
- (2) A positive skin test and/or oral challenge occurred in 1/187 (0.5%) patients in the intervention group and 5/190 (2.6%) in the control group with a RD of -2.10 (90% CI, -4.20, 0.01) and a risk ratio of 0.20 (90% CI, 0.03, 1.22).

**eTable 1.** Skin testing drug allergy concentrations and type of penicillin and doses used in the trial

**A. Drug allergy testing concentrations**

|                                                                    |
|--------------------------------------------------------------------|
| <b>Skin prick testing (read at 15 min)</b>                         |
| Histamine 10 mg/ml                                                 |
| Sodium chloride 0.9%                                               |
| Diater PPL (major determinant)*                                    |
| Diater MDM (minor determinant)*                                    |
| Benzylpenicilloyl polylysine 6.0 X 10 <sup>-5</sup> M (Pre-Pen®) † |
| Ampicillin 25 mg/ml                                                |
| Penicillin G 10 000 U/ml                                           |
| <b>Intradermal testing (0.02 mL) (read at 15 min)</b>              |
| Sodium chloride 0.9%.                                              |
| Diater PPL (major determinant) *                                   |
| Diater MDM (minor determinant) *                                   |
| Benzylpenicilloyl polylysine 6.0 X 10 <sup>-5</sup> M (Pre-Pen®) † |
| Ampicillin 25 mg/mL                                                |
| Penicillin G 10 000 U/mL                                           |

MDM=minor determinant mixture. mg=milligram. ml=milliliter. PPL=penicilloyl-polylysine. U= unit.

\*At the Australian sites, validated Diater reagents (DAP; Madrid, Spain) were used for the major (benzylpenicilloyl-poyl-L-lysine [PPL]) and minor determinant mixtures (MDM). Penicillin G and ampicillin were also used for all patients.

† At the North American sites, the major determinant benzylpenicilloyl polylysine 6.0 X 10<sup>-5</sup> M (Pre-Pen®) was used. As the minor determinant was unavailable, penicillin G and ampicillin were used as surrogates for the Diater MDM.

Notes:

(1) The skin test reading was performed in two sequential steps: prick testing and, if negative, intradermal testing after 15 minutes.

(2) A positive skin test definition was a ≥ 3 mm wheal and ≥ 5 mm compared to the negative control (sodium chloride 0.9%).

**B. Type of penicillin and doses used in the trial.**

| <b>Antibiotic and dose</b>  | <b>Intervention group (n= 187)</b> | <b>Control group (n = 190)</b> |
|-----------------------------|------------------------------------|--------------------------------|
| Amoxicillin 250 mg          | 91 (49%)                           | 101 (53%)                      |
| Amoxicillin 500 mg          | 67 (36%)                           | 68 (36%)                       |
| Amoxicillin 400 mg (2-step) | 12 (6%)                            | 11 (6%)                        |
| Penicillin VK 250 mg        | 15 (8%)                            | 7 (5%)                         |
| Penicillin VK 500 mg        | 1 (1%)                             | 0 (0%)                         |
| Penicillin VK 300 mg        | 0 (0%)                             | 1 (1%)                         |
| Flucloxacillin 250 mg       | 1 (1%)                             | 0 (0%)                         |
| No challenge                | 0 (0%)                             | 2 (1%)                         |

Data are n (%).

**eTable 2.** Characteristics of patients with positive primary outcomes

|                                                | <b>Intervention group<br/>(n=1)</b>                                                                                    | <b>Control group<br/>(n=1)</b>                                                                                     |
|------------------------------------------------|------------------------------------------------------------------------------------------------------------------------|--------------------------------------------------------------------------------------------------------------------|
| Age group                                      | 30-40                                                                                                                  | 30-40                                                                                                              |
| Sex                                            | Female                                                                                                                 | Female                                                                                                             |
| Race                                           | White                                                                                                                  | White                                                                                                              |
| Other allergy reported                         | Yes (TMP-SMX,<br>Cefdinir)                                                                                             | No                                                                                                                 |
| History of idiopathic urticaria/ angioedema    | No                                                                                                                     | No                                                                                                                 |
| Reported penicillin allergy label              | Penicillin unspecified                                                                                                 | Penicillin<br>unspecified                                                                                          |
| PEN-FAST score                                 | 1                                                                                                                      | 1                                                                                                                  |
| Clinical phenotype                             | Unknown phenotype                                                                                                      | Delayed phenotype                                                                                                  |
| Childhood reaction                             | Yes                                                                                                                    | No                                                                                                                 |
| Time since reaction                            | >15 years ago                                                                                                          | >15 years ago                                                                                                      |
| Antibiotic used in oral challenge              | Amoxicillin                                                                                                            | Amoxicillin                                                                                                        |
| Antibiotic dose in oral challenge              | 2-step challenge (80<br>mg + 320 mg)                                                                                   | 250 mg                                                                                                             |
| Description of the reaction                    | 15 min: itching over<br>neck/left upper back<br>30 min: objective<br>erythematous<br>macules confirmed<br>by physician | 53 min: itchiness on<br>the abdomen<br>60 min: urticaria on<br>the abdomen, back,<br>shoulders and neck,<br>ankles |
| Time following oral penicillin challenge (min) | 20                                                                                                                     | 50                                                                                                                 |
| Grade of the reaction                          | 2                                                                                                                      | 1                                                                                                                  |
| Treatment (single dose)                        | Diphenhydramine 25<br>mg PO                                                                                            | Loratadine 10 mg<br>PO                                                                                             |

min=minutes. TMP-SMX= trimethoprim-sulfamethoxazole.

**eTable 3.** Sensitivity analysis using exact methods for confidence intervals

|                                                             | Intervention | Control      | Risk difference (exact 90% CI), percentage points |
|-------------------------------------------------------------|--------------|--------------|---------------------------------------------------|
| <b>Primary outcome</b>                                      |              |              |                                                   |
| Positive oral challenge                                     | 1/187 (0.5%) | 1/190 (0.5%) | 0.1 (-1.8, 1.9)                                   |
| <b>Secondary outcomes (post-hoc)</b>                        |              |              |                                                   |
| Positive oral challenge (per protocol)                      | 0/175 (0%)   | 1/176 (0.6%) | -0.4 (-2.6, 1.0)                                  |
| Positive skin test or positive oral challenge               | 1/187 (0.5%) | 5/190 (2.6%) | -2.1 (-4.8, 1.0)                                  |
| <b>Subgroup analysis of primary outcome</b>                 |              |              |                                                   |
| Pen-fast score (post-hoc)                                   |              |              |                                                   |
| 0 (n=152)                                                   | 0/79 (0%)    | 0/73 (0%)    | 0 (-4.0, 3.6)                                     |
| 1 (n=209)                                                   | 1/97 (1.0%)  | 1/112 (0.9%) | 0.1 (-3.1, 3.8)                                   |
| 2 (n=16)                                                    | 0/11 (0%)    | 0/5 (0%)     | 0 (-45.0, 24.5)                                   |
| Clinical immunophenotype                                    |              |              |                                                   |
| Immediate reaction (n=39)                                   | 0/25 (0%)    | 0/14 (0%)    | 0 (-19.2, 11.2)                                   |
| Delayed reaction (n=124)                                    | 0/60 (0%)    | 1/64 (1.6%)  | -1.6 (-7.1, 3.0)                                  |
| Unknown (n=214)                                             | 1/102 (1.0%) | 0/112 (0%)   | 1.0 (-1.6, 4.5)                                   |
| Number of reported drug allergies                           |              |              |                                                   |
| Single (n=299)                                              | 0/150 (0%)   | 1/149 (0.7%) | -0.7 (-3.1, 1.1)                                  |
| Multiple (n=78)                                             | 1/37 (2.7%)  | 0/41 (0%)    | 2.7 (-4.0, 12.1)                                  |
| Immunocompetency                                            |              |              |                                                   |
| Immunocompetent (n=295)                                     | 1/150 (0.7%) | 1/145 (0.7%) | -0.02 (-2.4, 2.2)                                 |
| Immunocompromised (n=82)                                    | 0/37 (0%)    | 0/45 (0%)    | 0 (-6.4, 7.7)                                     |
| Age                                                         |              |              |                                                   |
| <65 (n=282)                                                 | 1/141 (0.7%) | 1/141 (0.7%) | 0 (-2.5, 2.5)                                     |
| ≥65 (n=95)                                                  | 0/46 (0%)    | 0/49 (0%)    | 0 (-5.9, 6.2)                                     |
| Sex                                                         |              |              |                                                   |
| Male (n=130)                                                | 0/71 (0%)    | 0/59 (0%)    | 0 (-4.9, 4.0)                                     |
| Female (n=247)                                              | 1/116 (0.9%) | 1/131 (0.8%) | 0.10 (-2.6, 3.1)                                  |
| Penicillin type                                             |              |              |                                                   |
| Penicillin unspecified (n=302)                              | 1/146 (0.7%) | 1/156 (0.6%) | 0.04 (-2.2, 2.4)                                  |
| Penicillin VK/G or dicloxacillin or flucloxacillin (n=14)   | 0/6 (0%)     | 0/8 (0%)     | 0 (-31.1, 39.2)                                   |
| Amoxicillin or ampicillin or amoxicillin clavulanate (n=61) | 0/35 (0%)    | 0/26 (0%)    | 0 (-10.9, 8.2)                                    |



|                     |             |              |                   |
|---------------------|-------------|--------------|-------------------|
| Oral challenge dose |             |              |                   |
| 250 mg (n=215)      | 0/107 (0%)  | 1/108 (0.9%) | -0.9 (-4.3, 1.7)  |
| 500 mg (n=137)      | 0/68 (0%)   | 0/69 (0%)    | 0 (-4.2, 4.2)     |
| Other* (n=24)       | 1/12 (8.3%) | 0/12 (0%)    | 8.3 (-12.9, 33.8) |

\*Other: all but one were 400 mg (one was 300 mg)

**eTable 4.** Safety outcomes in the first 2 days and 5 days following oral penicillin challenge

|                                                          | <b>Intervention</b>         | <b>Control</b>              | <b>Risk difference (95% CI), percentage points</b> | <b>Risk ratio (95% CI)</b> |
|----------------------------------------------------------|-----------------------------|-----------------------------|----------------------------------------------------|----------------------------|
| <b>Cumulative within 48 hours of challenge (2 days)</b>  |                             |                             |                                                    |                            |
| All adverse events                                       | 18/187 (10%)<br>(20 events) | 17/190 (9%)<br>(20 events)  | 0.68 (-5.18, 6.54)                                 | 1.08 (0.57, 2.02)          |
| Immune mediated adverse event                            | 8/187 (4%)<br>(9 events)    | 6/190 (3%)<br>(6 events)    | 1.12 (-2.70, 4.94)                                 | 1.35 (0.48, 3.83)          |
| Antibiotic related immune mediated <sup>a</sup>          | 7/187 (4%)<br>(8 events)    | 5/190 (3%)<br>(5 events)    | 1.11 (-2.44, 4.66)                                 | 1.42 (0.46, 4.40)          |
| Non-immune mediated adverse event                        | 10/187 (5%)<br>(11 events)  | 12/190 (6%)<br>(14 events)  | -0.97 (-5.70, 3.76)                                | 0.85 (0.37, 1.91)          |
| <b>Cumulative within 120 hours of challenge (5 days)</b> |                             |                             |                                                    |                            |
| All adverse events                                       | 20/187 (11%)<br>(22 events) | 21/190 (11%)<br>(24 events) | -0.36 (-6.64, 5.93)                                | 0.97 (0.54, 1.73)          |
| Immune mediated adverse event                            | 9/187 (5%)<br>(10 events)   | 10/190 (5%)<br>(10 events)  | -0.45 (-4.87, 3.96)                                | 0.91 (0.38, 2.20)          |
| Non-immune mediated adverse event                        | 11/187 (6%)<br>(12 events)  | 12/190 (6%)<br>(14 events)  | -0.43 (-5.26, 4.40)                                | 0.93 (0.42, 2.06)          |
| <b>Other safety outcomes</b>                             |                             |                             |                                                    |                            |
| Serious adverse event at any time                        | 0/187 (0%)                  | 0/190 (0%)                  | N/A                                                | N/A                        |
| Protocol compliance <sup>b,c</sup>                       | 175/190<br>(92%)            | 176/192<br>(92%)            | 0.44 (-5.04, 5.91)                                 | 1.01 (0.95, 1.07)          |

<sup>a</sup> The antibiotic-related immune-mediated events are immune-mediated reactions that have a degree of causality: certain, probable/likely or possible

<sup>b</sup> Protocol compliance is defined as an absence of protocol violations (regardless of protocol deviations). The protocol violation occurred in a total of 31 patients: absence of performed intradermal testing in the control group and 2-step oral challenge (N=1), oral penicillin challenge was not performed following negative skin testing (N=2), oral penicillin challenge was performed after positive skin testing (N=2), patients meeting exclusion criteria and were subsequently excluded following randomization (N=3), 2-step oral challenge within the protocol dose range of 250-500 mg (N=23).

**eTable 5.** Safety outcome inclusions

**A. Reported reactions classified as possibly immune-mediated**

|                                                                                                                                                                                                                                                                                                                                                                                                                                                                                                                 |
|-----------------------------------------------------------------------------------------------------------------------------------------------------------------------------------------------------------------------------------------------------------------------------------------------------------------------------------------------------------------------------------------------------------------------------------------------------------------------------------------------------------------|
| <b>Immediate diffuse rash/urticaria</b>                                                                                                                                                                                                                                                                                                                                                                                                                                                                         |
| <b>Delayed diffuse rash/urticaria</b> (more than 1 hour) e.g. maculopapular rash; rash to torso and back                                                                                                                                                                                                                                                                                                                                                                                                        |
| <b>Localised reaction</b> (examples of reactions: positive skin testing; immediate localized rash and redness on the chest (area of 6 cm), red macules on the legs; blister type rash <1 cm in size on chest; localised facial rash; localised rashes at left forearm (IDT site); localized oedema; localized macular eruption; 3-4 localized papules on left forearm where he had skin testing for aeroallergens; peri-orbital eczema; rash under arm that spread to arm lasting 2 days; swelling of the hands |

**B. Reported reactions classified as possibly non-immune-mediated**

|                                                                            |
|----------------------------------------------------------------------------|
| <b>Nausea/Abdominal pain/vomiting/diarrhea</b>                             |
| <b>Headache</b>                                                            |
| <b>Isolated skin itchiness</b>                                             |
| Candida vulvovaginitis                                                     |
| Isolated chest tightness                                                   |
| Fatigue                                                                    |
| Localized swelling sensation (absence of objective findings)               |
| Mouth metallic taste                                                       |
| Nasal irritation / Sinus discomfort                                        |
| Sensation of facial numbness / Tingling on the face and side of the tongue |

**eTable 6.** Efficacy outcomes

## A. Penicillin allergy delabel and the number of appointments required for delabeling

|                                        | <b>Intervention</b> | <b>Control</b>  | <b>Risk difference<br/>(95% CI),<br/>percentage points</b> | <b>Risk ratio<br/>(95% CI)</b> |
|----------------------------------------|---------------------|-----------------|------------------------------------------------------------|--------------------------------|
| Delabeled *                            | 186/187 (99.5%)     | 186/190 (97.9%) | 1.57 (-0.72, 3.86)                                         | 1.02 (0.99, 1.04)              |
| <b>Number of appointments required</b> |                     |                 |                                                            |                                |
| 1                                      | 184/186 (98.9%)     | 184/186 (98.9%) | Ref                                                        | Ref                            |
| 2                                      | 2/186 (1.1%)        | 2/186 (1.1%)    | 0.00 (-2.10, 2.10)                                         | 1.00 (0.13, 7.02)              |

Data are n (%)

**Notes:**

\* A patient from the intervention group was not delabeled because of a positive oral challenge (primary outcome). Four patients from the control group were not delabeled because one patient had a positive oral challenge (primary outcome); two patients had positive skin testing and no penicillin oral challenge was performed; and one patient had a delayed positive intradermal test to penicillin G and ampicillin and was re-labelled following a single dose negative oral challenge. This last patient had a confirmed delayed positive intra-dermal testing and safely tolerated a 5-day cephalexin challenge.

## B. Time from randomization to delabeling

|                                               | <b>Intervention<br/>(n=186)</b> | <b>Control<br/>(n=186)</b> | <b>Median difference<br/>(95%CI)</b> |
|-----------------------------------------------|---------------------------------|----------------------------|--------------------------------------|
| Time from randomisation to delabeling (hours) | 1.80 (1.33, 3.72)               | 2.28 (1.72, 5.48)          | - 0.45 (-0.65, -0.27)                |

Data are median (IQR).
