# Supplementary material
Source: PubMed Central journal article supplement (PMC10352926)
Supplement: jamainternmed-e232986-s004.pdf [file jamainternmed-e232986-s004.pdf]

## Data Sharing Statement

Copaescu. Efficacy of a Clinical Decision Rule to Enable Direct Oral Challenge in Patients With Low-Risk Penicillin Allergy. *JAMA Intern Med.* Published July 17, 2023.

doi:10.1001/jamainternmed.2023.2986

### Data

**Data available:** No

### Additional Information

**Explanation for why data not available:** Deidentified participant data will be available 12 months after publication upon request and approval of the proposal by the trial steering committee. The trial protocol and statistical analysis plan are available on the [clinicaltrials.gov](https://clinicaltrials.gov) website.
